# Supplementary material for: Investigating cooperative effects in small cobalt and cobalt–nickel alloy clusters with attached ethanol
Source: Royal Society of Chemistry journal article supplement (doi:10.1039/d3cp02448b), 2023-01-01
Supplement: d3cp02448b1.pdf [file d3cp02448b1.pdf]

## Supporting Information

# Investigating cooperative effects in small cobalt and cobalt-nickel alloy clusters with attached ethanol

Fabian Dietrich,<sup>\*a,b</sup> Markus Becherer,<sup>b</sup> Daniel Bellaire,<sup>b</sup> Paulina Martínez-Rodríguez,<sup>c</sup> and Markus Gerhards<sup>b</sup>

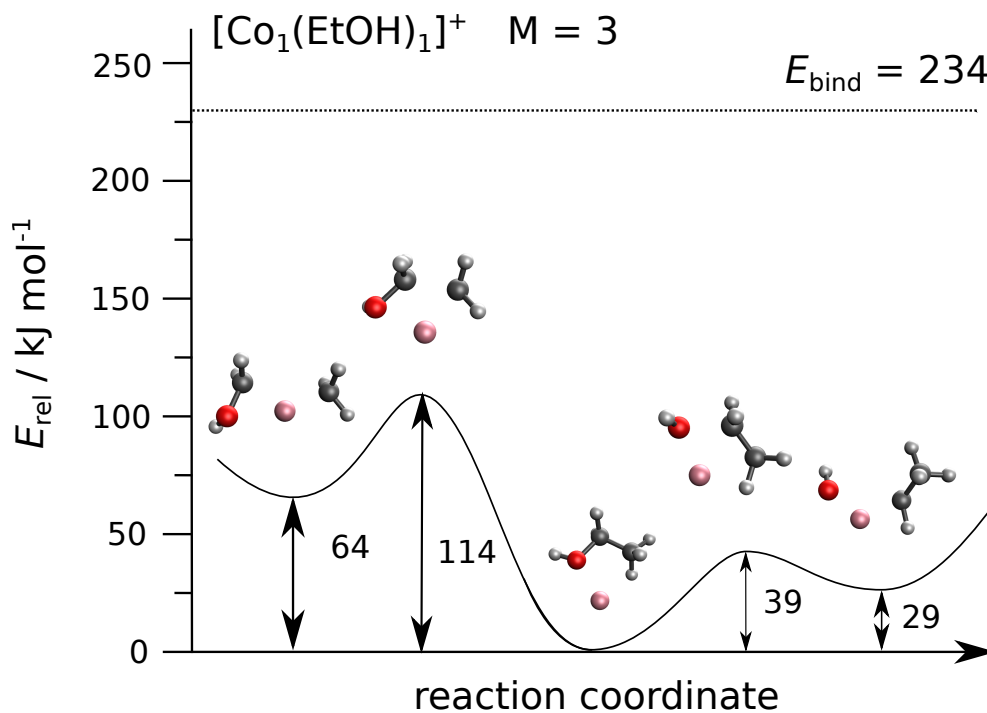

Figure S 1 Calculated reaction pathways for the  $[\text{Co}_1(\text{EtOH})_1]^+$  cluster, all energies in kJ/mol.

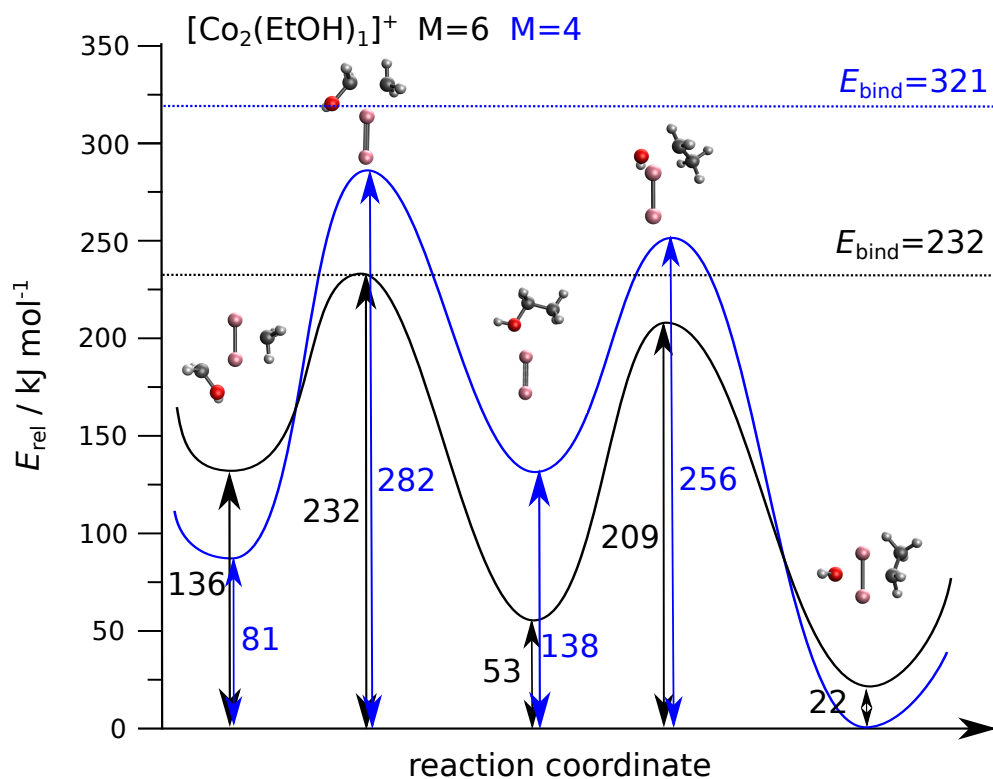

Figure S 2 Calculated reaction pathways for the  $[\text{Co}_2(\text{EtOH})_1]^+$  cluster, all energies in kJ/mol.

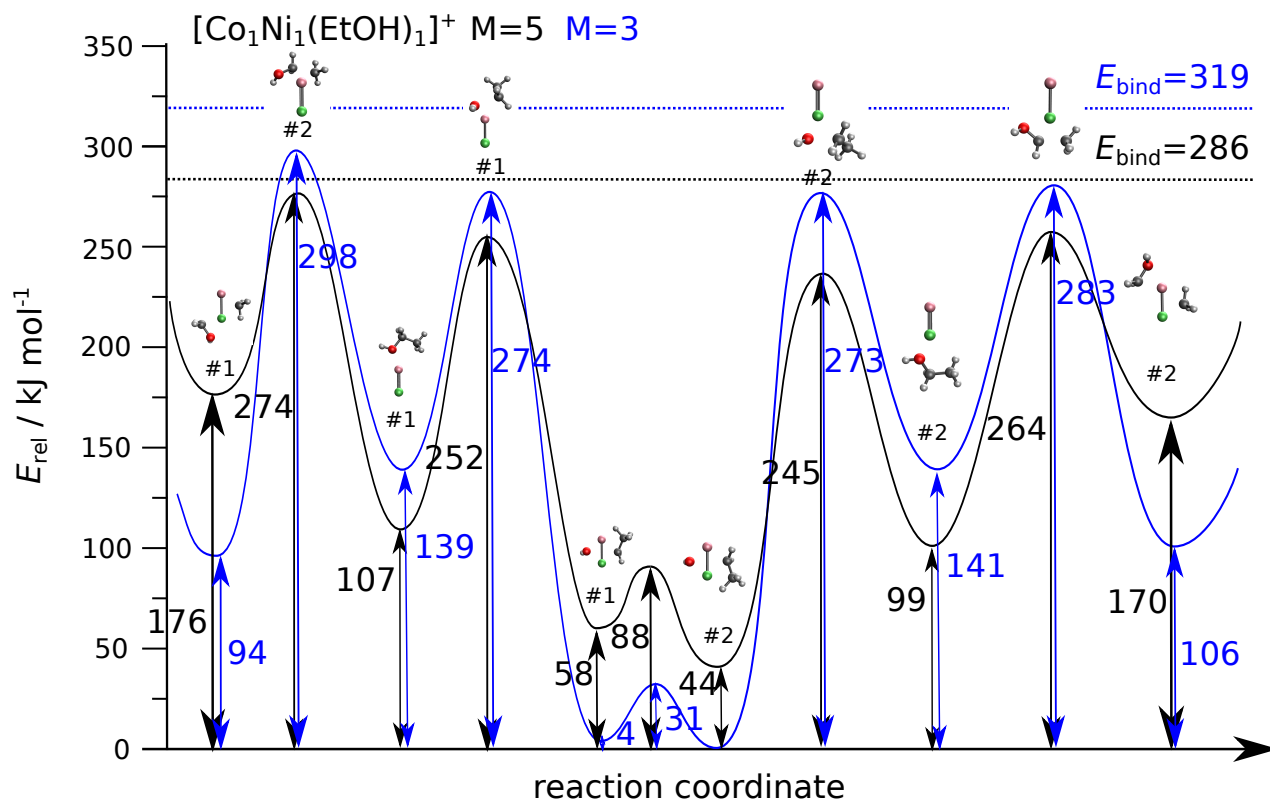

Figure S 3 Calculated reaction pathways for the  $[\text{Co}_1\text{Ni}_1(\text{EtOH})_1]^+$  cluster, all energies in kJ/mol.

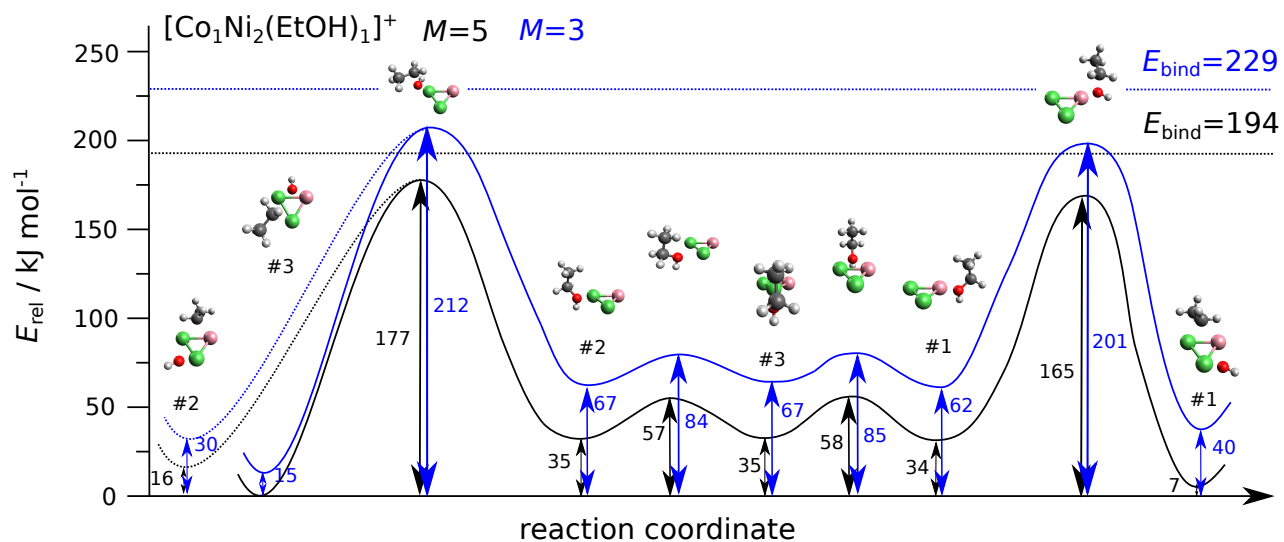

Figure S 4 Calculated reaction pathways for the  $[\text{Co}_1\text{Ni}_2(\text{EtOH})]^+$  cluster, all energies in kJ/mol.

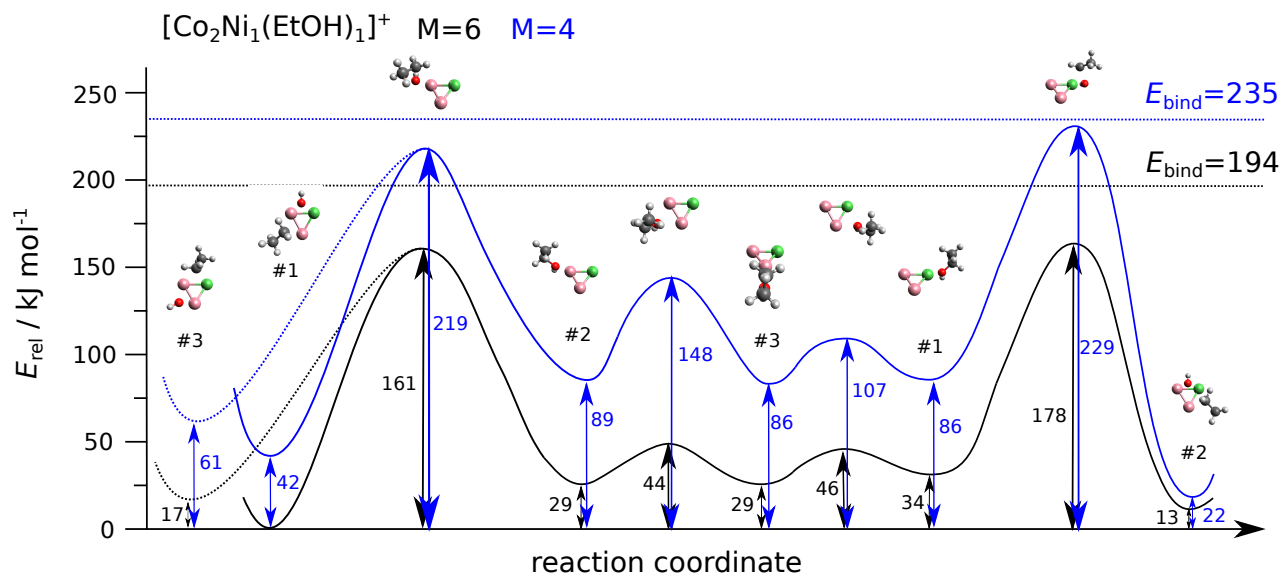

Figure S 5 Calculated reaction pathways for the  $[\text{Co}_2\text{Ni}_1(\text{EtOH})]^+$  cluster, all energies in kJ/mol.

**Table S 1** Charge distribution from NBO calculations on optimized structures of  $[\text{Co}_1(\text{EtOH})_1]^+$  and  $[\text{Co}_2(\text{EtOH})_1]^+$ . The values for  $[\text{Co}_3(\text{EtOH})_1]^+$  are given for comparison, because they were not given in [15].

| cluster core             | $\text{Co}^+$                   |                                      | $\text{Co}_2^+$                 |                                      | $\text{Co}_2^+$                 |                                      | $\text{Co}_3^+$                 |
|--------------------------|---------------------------------|--------------------------------------|---------------------------------|--------------------------------------|---------------------------------|--------------------------------------|---------------------------------|
| motif                    | $\text{C}_2\text{H}_5\text{OH}$ | $\text{C}_2\text{H}_5$ & $\text{OH}$ | $\text{C}_2\text{H}_5\text{OH}$ | $\text{C}_2\text{H}_5$ & $\text{OH}$ | $\text{C}_2\text{H}_5\text{OH}$ | $\text{C}_2\text{H}_5$ & $\text{OH}$ | $\text{C}_2\text{H}_5\text{OH}$ |
| <i>M</i>                 | 3                               | 3                                    | 4                               | 4                                    | 6                               | 6                                    | 7                               |
| M1                       | 0.875                           | 1.140                                | 0.573                           | 0.885                                | 0.571                           | 1.006                                | 0.363 (O)                       |
| M2                       | -                               | -                                    | 0.304                           | 0.768                                | 0.310                           | 0.985                                | 0.265                           |
| M3                       | -                               | -                                    | -                               | -                                    | -                               | -                                    | 0.264                           |
| $\Sigma(\text{core})$    | 0.875                           | 1.140                                | 0.877                           | 1.653                                | 0.881                           | 1.991                                | 0.892                           |
| O                        | -0.806                          | -0.792                               | -0.820                          | -1.022                               | -0.828                          | -1.136                               | -0.817                          |
| H(O)                     | 0.525                           | 0.489                                | 0.523                           | 0.496                                | 0.523                           | 0.519                                | 0.518                           |
| $\Sigma(\text{OH})$      | -0.281                          | -0.303                               | -0.297                          | -0.526                               | -0.305                          | -0.617                               | -0.299                          |
| $\text{C}_1$             | -0.069                          | -0.408                               | -0.054                          | -0.677                               | -0.053                          | -0.900                               | -0.054                          |
| $\text{H}_1(\text{C}_1)$ | 0.222                           | 0.196                                | 0.208                           | 0.246                                | 0.208                           | 0.262                                | 0.204                           |
| $\text{H}_2(\text{C}_1)$ | 0.210                           | 0.239                                | 0.209                           | 0.208                                | 0.208                           | 0.211                                | 0.202                           |
| $\text{C}_2$             | -0.653                          | -0.669                               | -0.659                          | -0.622                               | -0.656                          | -0.645                               | -0.651                          |
| $\text{H}_1(\text{C}_2)$ | 0.247                           | 0.252                                | 0.225                           | 0.266                                | 0.225                           | 0.245                                | 0.260                           |
| $\text{H}_2(\text{C}_2)$ | 0.289                           | 0.263                                | 0.267                           | 0.178                                | 0.265                           | 0.223                                | 0.224                           |
| $\text{H}_3(\text{C}_2)$ | 0.161                           | 0.289                                | 0.223                           | 0.275                                | 0.225                           | 0.229                                | 0.221                           |
| $\Sigma(\text{EtOH})$    | 0.126                           | -0.141                               | 0.122                           | -0.652                               | 0.117                           | -0.992                               | 0.107                           |

**Table S 2** Charge distribution from NBO calculations on optimized structures of  $[\text{Co}_1\text{Ni}_1(\text{EtOH})_1]^+$ .

| cluster core             | $\text{CoNi}^+$                    |                                    | $\text{CoNi}^+$                         |                                         |
|--------------------------|------------------------------------|------------------------------------|-----------------------------------------|-----------------------------------------|
| motif                    | $\text{C}_2\text{H}_5\text{OH}$ #1 | $\text{C}_2\text{H}_5\text{OH}$ #2 | $\text{C}_2\text{H}_5$ & $\text{OH}$ #1 | $\text{C}_2\text{H}_5$ & $\text{OH}$ #1 |
| <i>M</i>                 | 5                                  | 5                                  | 3                                       | 5                                       |
| M1                       | 0.604 (Co)                         | 0.484 (Ni)                         | 0.866 (Co)                              | 1.050 (Co)                              |
| M2                       | 0.265 (Ni)                         | 0.383 (Co)                         | 0.747 (Ni)                              | 0.926 (Ni)                              |
| M3                       | -                                  | -                                  | -                                       | -                                       |
| $\Sigma(\text{core})$    | 0.869                              | 0.867                              | 1.613                                   | 1.976                                   |
| O                        | -0.820                             | -0.812                             | -1.001                                  | -1.132                                  |
| H(O)                     | 0.524                              | 0.523                              | 0.496                                   | 0.521                                   |
| $\Sigma(\text{OH})$      | -0.296                             | -0.289                             | -0.505                                  | -0.611                                  |
| $\text{C}_1$             | -0.055                             | -0.054                             | -0.663                                  | -0.857                                  |
| $\text{H}_1(\text{C}_1)$ | 0.208                              | 0.207                              | 0.215                                   | 0.176                                   |
| $\text{H}_2(\text{C}_1)$ | 0.212                              | 0.209                              | 0.248                                   | 0.254                                   |
| $\text{C}_2$             | -0.659                             | -0.656                             | -0.632                                  | -0.645                                  |
| $\text{H}_1(\text{C}_2)$ | 0.269                              | 0.223                              | 0.177                                   | 0.229                                   |
| $\text{H}_2(\text{C}_2)$ | 0.228                              | 0.228                              | 0.267                                   | 0.247                                   |
| $\text{H}_3(\text{C}_2)$ | 0.223                              | 0.264                              | 0.279                                   | 0.232                                   |
| $\Sigma(\text{EtOH})$    | 0.130                              | 0.132                              | -0.614                                  | -0.975                                  |

**Table S 3** Charge distribution from NBO calculations on optimized structures of  $[\text{Co}_1\text{Ni}_2(\text{EtOH})_1]^+$ .

| cluster core             | $\text{CoNi}_2^+$                   | $\text{CoNi}_2^+$                   | $\text{CoNi}_2^+$                       | $\text{CoNi}_2^+$                       | $\text{CoNi}_2^+$                       |
|--------------------------|-------------------------------------|-------------------------------------|-----------------------------------------|-----------------------------------------|-----------------------------------------|
| motif                    | $\text{C}_2\text{H}_5\text{OH} \#1$ | $\text{C}_2\text{H}_5\text{OH} \#2$ | $\text{C}_2\text{H}_5 \& \text{OH} \#1$ | $\text{C}_2\text{H}_5 \& \text{OH} \#3$ | $\text{C}_2\text{H}_5 \& \text{OH} \#2$ |
| <i>M</i>                 | 5                                   | 5                                   | 5                                       | 5                                       | 5                                       |
| M1                       | 0.450 (Co-O)                        | 0.320 (Ni-O)                        | 0.652 (Ni-O)                            | 0.810 (Co-O)                            | 0.636 (Ni-O)                            |
| M2                       | 0.213 (Ni)                          | 0.355 (Co)                          | 0.795 (Co-O,C)                          | 0.632 (Ni-O,C)                          | 0.649 (Ni-O,C)                          |
| M3                       | 0.213 (Ni)                          | 0.218 (Ni)                          | 0.391 (Ni-C)                            | 0.340 (Ni-C)                            | 0.558 (Co-C)                            |
| $\Sigma(\text{core})$    | 0.876                               | 0.893                               | 1.838                                   | 1.782                                   | 1.843                                   |
| O                        | -0.813                              | -0.814                              | -1.091                                  | -1.112                                  | -1.082                                  |
| H(O)                     | 0.518                               | 0.517                               | 0.495                                   | 0.503                                   | 0.493                                   |
| $\Sigma(\text{OH})$      | -0.295                              | -0.297                              | -0.596                                  | -0.609                                  | -0.589                                  |
| $\text{C}_1$             | -0.055                              | -0.055                              | -0.723                                  | -0.568                                  | -0.756                                  |
| $\text{H}_1(\text{C}_1)$ | 0.205                               | 0.205                               | 0.244                                   | 0.234                                   | 0.247                                   |
| $\text{H}_2(\text{C}_1)$ | 0.205                               | 0.201                               | 0.183                                   | 0.103                                   | 0.200                                   |
| $\text{C}_2$             | -0.655                              | -0.651                              | -0.673                                  | -0.674                                  | -0.660                                  |
| $\text{H}_1(\text{C}_2)$ | 0.264                               | 0.26                                | 0.261                                   | 0.262                                   | 0.253                                   |
| $\text{H}_2(\text{C}_2)$ | 0.223                               | 0.226                               | 0.233                                   | 0.237                                   | 0.231                                   |
| $\text{H}_3(\text{C}_2)$ | 0.223                               | 0.219                               | 0.232                                   | 0.232                                   | 0.230                                   |
| $\Sigma(\text{EtOH})$    | 0.115                               | 0.108                               | -0.839                                  | -0.783                                  | -0.844                                  |

**Table S 4** Charge distribution from NBO calculations on optimized structures of  $[\text{Co}_2\text{Ni}_1(\text{EtOH})_1]^+$ .

| cluster core             | $\text{Co}_2\text{Ni}^+$            | $\text{Co}_2\text{Ni}^+$            | $\text{Co}_2\text{Ni}^+$                | $\text{Co}_2\text{Ni}^+$                | $\text{Co}_2\text{Ni}^+$                |
|--------------------------|-------------------------------------|-------------------------------------|-----------------------------------------|-----------------------------------------|-----------------------------------------|
| motif                    | $\text{C}_2\text{H}_5\text{OH} \#2$ | $\text{C}_2\text{H}_5\text{OH} \#1$ | $\text{C}_2\text{H}_5 \& \text{OH} \#2$ | $\text{C}_2\text{H}_5 \& \text{OH} \#1$ | $\text{C}_2\text{H}_5 \& \text{OH} \#3$ |
| <i>M</i>                 | 6                                   | 6                                   | 6                                       | 6                                       | 6                                       |
| M1                       | 0.408 (Co-O)                        | 0.279 (Ni-O)                        | 0.758 (Co-O)                            | 0.767 (Co-O)                            | 0.582 (Ni-O)                            |
| M2                       | 0.298 (Co)                          | 0.308 (Co)                          | 0.610 (Ni-O,C)                          | 0.749 (Co-O,C)                          | 0.746 (Co-O,C)                          |
| M3                       | 0.185 (Ni)                          | 0.309 (Co)                          | 0.483 (Co-C)                            | 0.322 (Ni-C)                            | 0.515 (Co-C)                            |
| $\Sigma(\text{core})$    | 0.891                               | 0.896                               | 1.851                                   | 1.848                                   | 1.843                                   |
| O                        | -0.818                              | -0.818                              | -1.108                                  | -1.113                                  | -1.075                                  |
| H(O)                     | 0.518                               | 0.516                               | 0.499                                   | 0.501                                   | 0.494                                   |
| $\Sigma(\text{OH})$      | -0.300                              | -0.302                              | -0.609                                  | -0.612                                  | -0.581                                  |
| $\text{C}_1$             | -0.054                              | -0.054                              | -0.736                                  | -0.708                                  | -0.750                                  |
| $\text{H}_1(\text{C}_1)$ | 0.203                               | 0.203                               | 0.244                                   | 0.245                                   | 0.249                                   |
| $\text{H}_2(\text{C}_1)$ | 0.205                               | 0.202                               | 0.199                                   | 0.186                                   | 0.197                                   |
| $\text{C}_2$             | -0.652                              | -0.649                              | -0.664                                  | -0.672                                  | -0.657                                  |
| $\text{H}_1(\text{C}_2)$ | 0.261                               | 0.258                               | 0.255                                   | 0.260                                   | 0.252                                   |
| $\text{H}_2(\text{C}_2)$ | 0.225                               | 0.223                               | 0.230                                   | 0.232                                   | 0.229                                   |
| $\text{H}_3(\text{C}_2)$ | 0.221                               | 0.222                               | 0.230                                   | 0.231                                   | 0.227                                   |
| $\Sigma(\text{EtOH})$    | 0.109                               | 0.103                               | -0.851                                  | -0.838                                  | -0.834                                  |

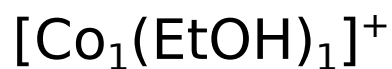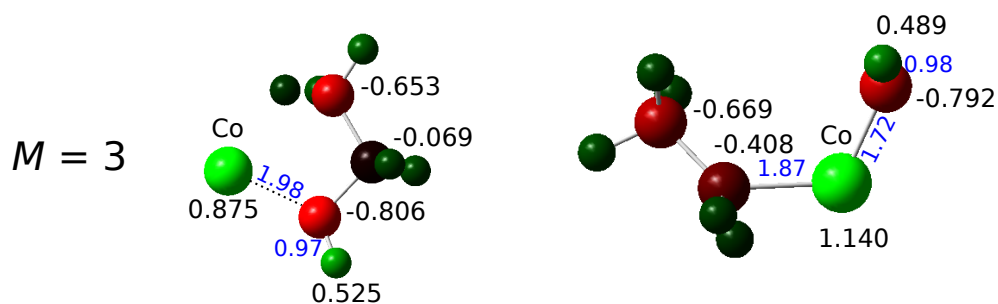

**Figure S 6** Charge distribution from NBO calculations (positive: green; negative: red) and atomic distances (blue; in Ångström) for  $[\text{Co}_1(\text{EtOH})_1]^+$ , given for the  $\text{C}_2\text{H}_5\text{OH}$  (left) and  $\text{C}_2\text{H}_5$  &  $\text{OH}$  motif (right) for  $M = 3$ , calculated at the BPW91/6-311+g(d,p) level.

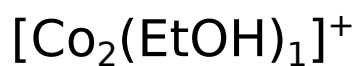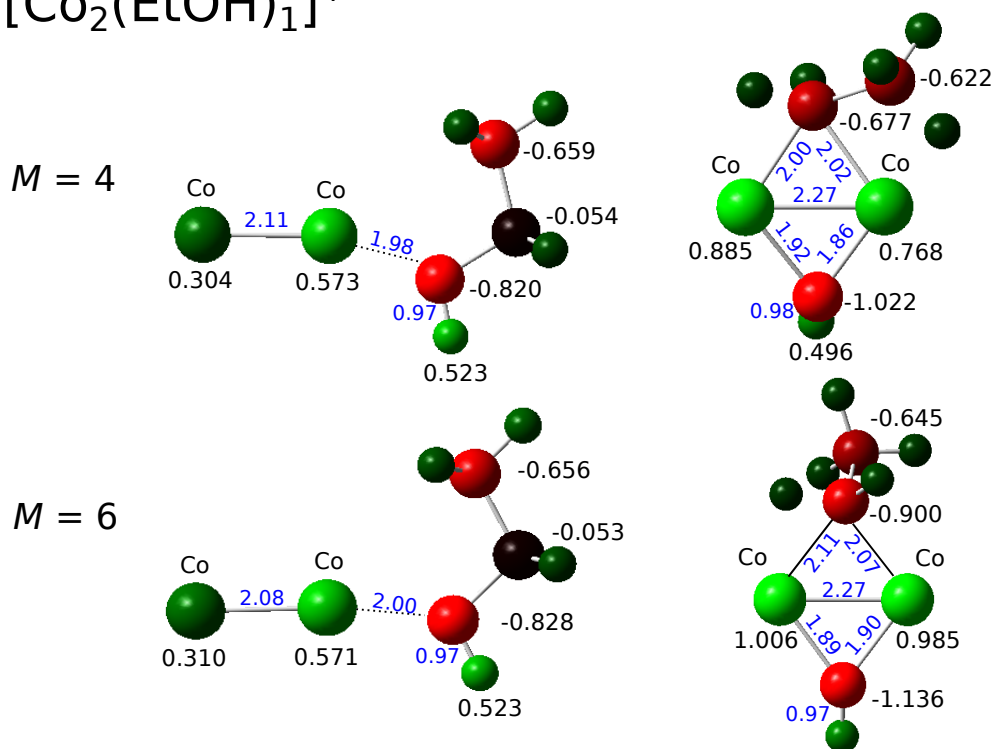

**Figure S 7** Charge distribution from NBO calculations (positive: green; negative: red) and atomic distances (blue; in Ångström) for  $[\text{Co}_2(\text{EtOH})_1]^+$ , given for the  $\text{C}_2\text{H}_5\text{OH}$  (left) and  $\text{C}_2\text{H}_5$  &  $\text{OH}$  motif (right) for  $M = 4$  (top) and  $M = 6$  (bottom), calculated at the BPW91/6-311+g(d,p) level.

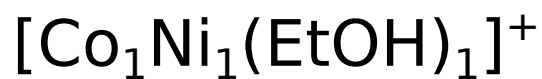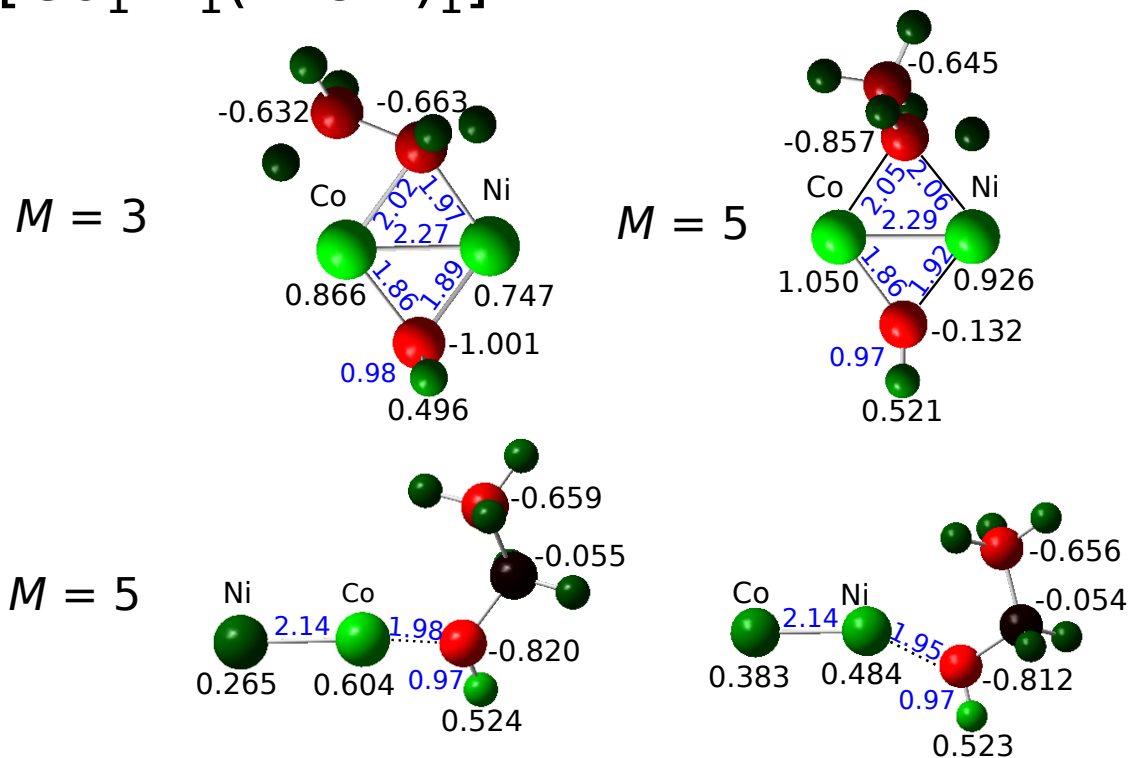

**Figure S 8** Charge distribution from NBO calculations (positive: green; negative: red) and atomic distances (blue; in Ångström) for  $[\text{Co}_1\text{Ni}_1(\text{EtOH})_1]^+$ , given for the  $\text{C}_2\text{H}_5$  &  $\text{OH}$  motif (top) in  $M = 3$  (left) and  $M = 5$  (right) as well as the geometries #1 (left) and #2 (right) of the  $\text{C}_2\text{H}_5\text{OH}$  motif (bottom) with  $M = 5$ , calculated at the BPW91/6-311+g(d,p) level.

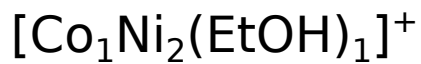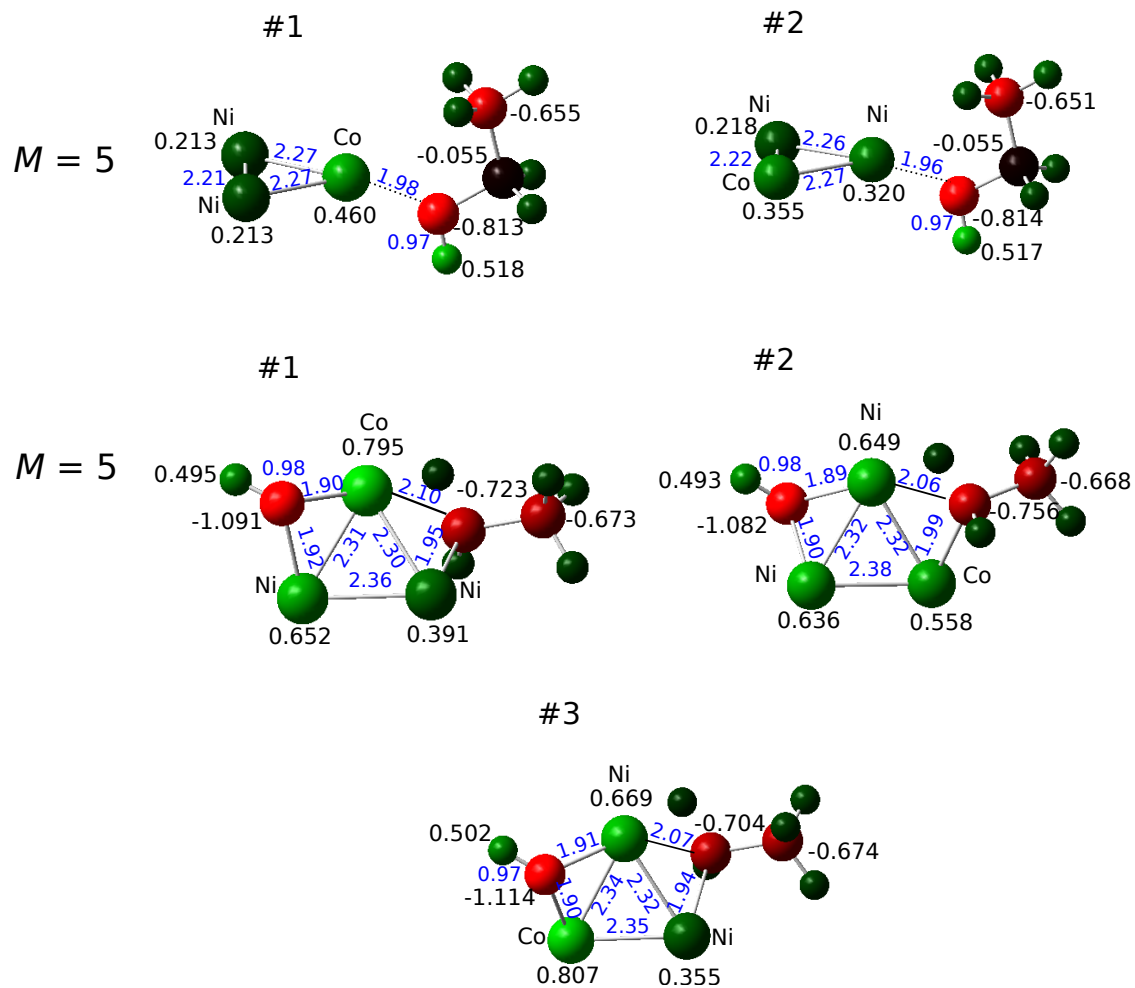

**Figure S 9** Charge distribution from NBO calculations (positive: green; negative: red) and atomic distances (blue; in Ångström) of the  $[\text{Co}_1\text{Ni}_2(\text{EtOH})_1]^+$  cluster, top:  $\text{C}_2\text{H}_5\text{OH}$  motif, middle and bottom:  $\text{C}_2\text{H}_5$  &  $\text{OH}$  motif with indicated geometry number; all in the multiplicity  $M = 5$ , calculated at the BPW91/6-311+g(d,p) level.



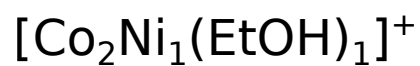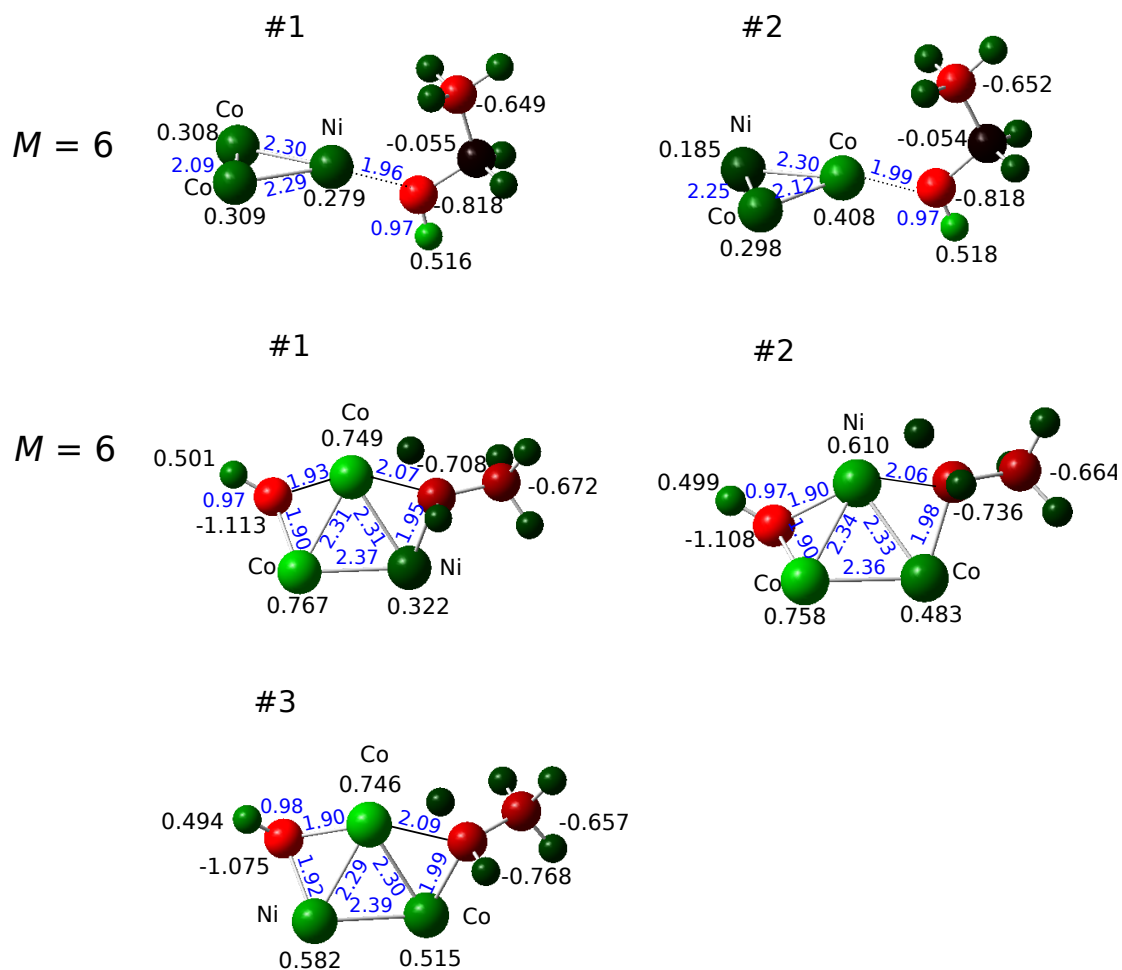

**Figure S 10** Charge distribution from NBO calculations (positive: green; negative: red) and atomic distances (blue; in Ångström) of the  $[\text{Co}_2\text{Ni}_1(\text{EtOH})_1]^+$  cluster, top:  $\text{C}_2\text{H}_5\text{OH}$  motif, middle and bottom:  $\text{C}_2\text{H}_5$  &  $\text{OH}$  motif with indicated geometry number; all in the multiplicity  $M = 6$ , calculated at the BPW91/6-311+g(d,p) level.
